# Supplementary material for: Azo-carbazole copolymer-based composite films with high optical transparency for updatable holograms
Source: Royal Society of Chemistry journal article supplement (doi:10.1039/d2nj05779d), 2023-01-01
Supplement: d2nj05779d2.pdf [file d2nj05779d2.pdf]

## Supplementary Information

### **Azo-carbazole copolymer-based composite films with high transparency for updatable holograms**

Kenji Kinashi <sup>a\*</sup>, Ikumi Nakanishi <sup>b</sup>, Wataru Sakai <sup>a</sup>, Naoto Tsutsumi <sup>a</sup>, Boaz Jessie Jackin <sup>c</sup>

a. Faculty of Materials Science and Engineering, Kyoto Institute of Technology, Matsugasaki, Sakyo, Kyoto 606-8585, Japan.

b. Master's Program of Innovative Materials, Graduate School of Science and Technology, Kyoto Institute of Technology, Matsugasaki, Sakyo, Kyoto 606-8585, Japan.

c. Materials Innovation Laboratory, Kyoto Institute of Technology

## Experimental

Diffraction efficiency was measured using a 4f reduction projection system, as shown in **Figure S1**. A vertical fringe pattern image with s-polarized 532 nm writing beam (500mW, Samba™, Cobolt Co.) reflected through a polarizing beam-splitter (PBS) were projected directly onto the film. A PC-controlled vertical fringe interference pattern with a grating number 100 on a special light modulator (SLM) (1920 pixels wide × 1080 pixel high; 8.0 μm pixel size, HOLOEYE Photonics Co.) gives fringe pattern spacing  $\Lambda = 25 \mu\text{m}$  on the film surface. A weak s-polarized probing beam of 1 mW DPSS laser at 640 nm (500 mW, Bolero™, Cobolt Co.) illuminated on the film surface, and then a first-order (+1<sup>st</sup> order) diffraction intensity from the resultant refractive index gratings was measured by a silicon photodiode. An ITO transparent heater (SS-051, BLAST Co.) was used for measuring thermal stability of the first-order diffraction intensity.

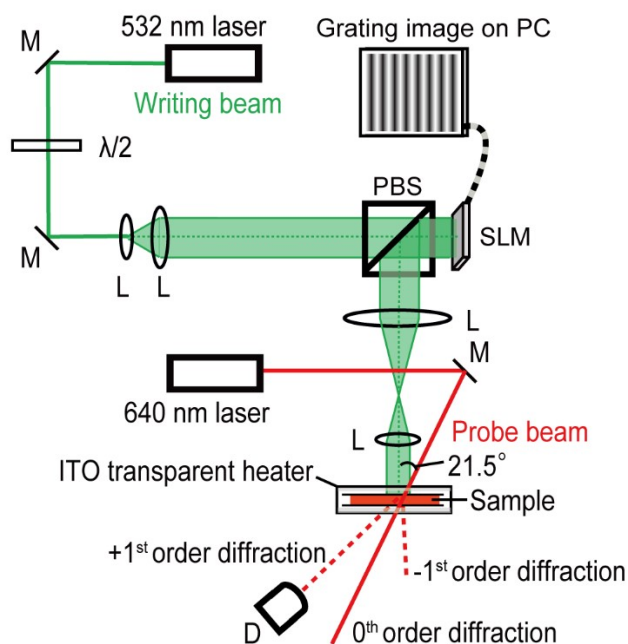

**Figure S1** Schematic representation of the 4f reduction projection system: L, lens; M, mirror;  $\lambda/2$ , half-wave plate; PBS, polarizing beam splitter; PC, personal computer; SLM, spatial light modulator; D, photodiode. Laser sources are a green CW laser at 532 nm for writing and a red laser at 640 nm for probing.

Schematic apparatus for the updatable holographic imaging of the object is shown in **Figure S2**. One s-polarized 532 nm recording beam (500 mW, Samba™, Cobolt Co.) reflected by a polarizing beam-splitter (PBS) was magnified by an objective lens (40x) and another lens to illuminate an object, and the reflected object beam was projected directly onto the film. The other s-polarized beam was used as a reference beam and interfered with the objective beam on the film surface. A half-wave plate in front of the PBS was used to control the intensity ratio of the object and reference beams. The recorded holograms were simultaneously reconstructed by a p-polarized 642 nm reconstruction beam (140 mW, PhoxX 642, Omicron Co.) magnified by a pair of lenses. The reconstructed hologram image was erased using an ITO transparent heater (SS-051, BLAST Co.).

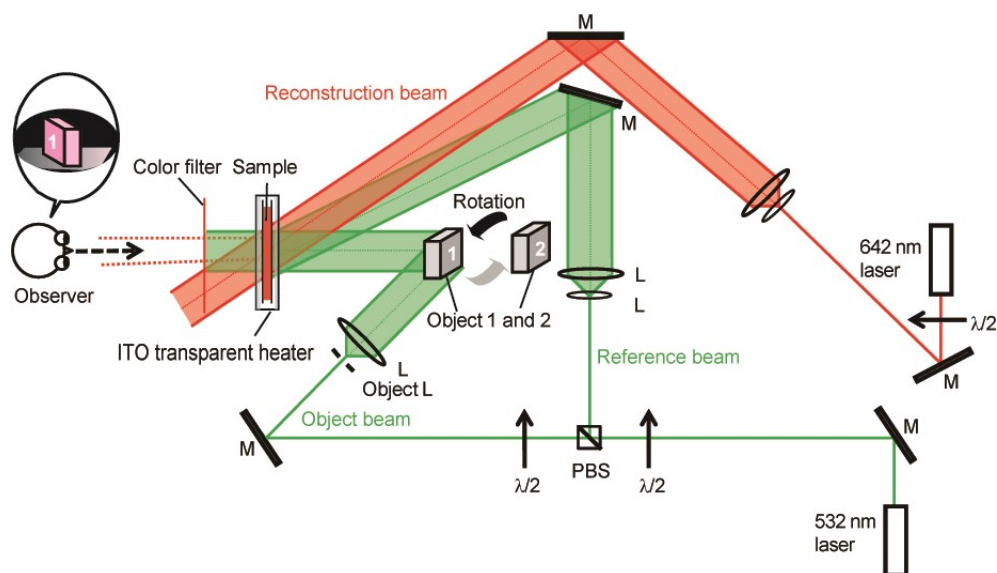

**Figure S2** Schematic representation of the holographic display system: L, lens; M, mirror;  $\lambda/2$ , half-wave plate; PBS, polarizing beam splitter. Laser sources are a green CW laser at 532 nm for recording and a red laser at 642 nm for reconstructing.

The haze value was measured to evaluate the transparency and scattering properties of the samples using an integrating sphere (**Figure S3**). The haze value (%) was calculated by

$$\text{Haze value} = \frac{T_d}{T_t} \times 100,$$

where  $T_t$  is the total transmitted light intensity, and  $T_d$  is the scattered transmitted light.

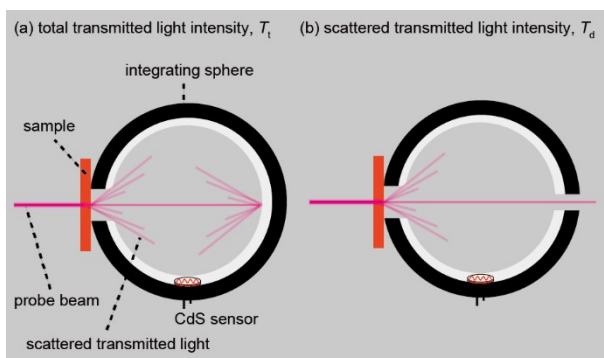

**Figure S3.** Haze value measurement system. (a) Measuring total transmitted light intensity. (b) Measuring scattered transmitted light intensity. A collimated light of 633 nm was used as the probe beam.

**Table S1.** Bessel functions of the first kind  $J_n(\delta)$  and corresponding first-order diffraction efficiencies.

| $\delta$ | $J_0(\delta)$ | $J_1(\delta)$ | $J_1^2(\delta)$ | $\eta_1, \%$ |
|----------|---------------|---------------|-----------------|--------------|
| 0.0      | 1             | 0             | 0               | 0            |
| 0.1      | 0.99750       | 0.04994       | 0.00250         | 0.25         |
| 0.2      | 0.99002       | 0.09950       | 0.00990         | 0.99         |
| 0.3      | 0.97763       | 0.14832       | 0.02200         | 2.20         |
| 0.4      | 0.96040       | 0.19603       | 0.03840         | 3.84         |
| 0.5      | 0.93847       | 0.24227       | 0.05870         | 5.87         |
| 0.6      | 0.91200       | 0.28670       | 0.08220         | 8.22         |
| 0.7      | 0.88120       | 0.32900       | 0.10820         | 10.82        |
| 0.8      | 0.84629       | 0.36884       | 0.13600         | 13.60        |
| 0.9      | 0.80752       | 0.40595       | 0.16480         | 16.48        |
| 1.0      | 0.76520       | 0.44005       | 0.19360         | 19.36        |
| 1.1      | 0.71962       | 0.47090       | 0.22170         | 22.17        |
| 1.2      | 0.67113       | 0.49829       | 0.24830         | 24.83        |
| 1.3      | 0.62009       | 0.52202       | 0.27250         | 27.25        |
| 1.4      | 0.56686       | 0.54195       | 0.29370         | 29.37        |
| 1.5      | 0.51183       | 0.55794       | 0.31130         | 31.13        |
| 1.6      | 0.45540       | 0.56990       | 0.32480         | 32.48        |
| 1.7      | 0.39798       | 0.57777       | 0.33380         | 33.38        |
| 1.8      | 0.33999       | 0.58152       | 0.33820         | 33.82        |
| 1.9      | 0.28182       | 0.58116       | 0.33770         | 33.77        |
| 2.0      | 0.22389       | 0.57672       | 0.33260         | 33.26        |
| 2.1      | 0.16661       | 0.56829       | 0.32295         | 32.30        |
| 2.2      | 0.11036       | 0.55596       | 0.30909         | 30.91        |
| 2.3      | 0.05554       | 0.53987       | 0.29146         | 29.15        |
| 2.4      | 0.00251       | 0.52019       | 0.27060         | 27.06        |
